# Supplementary material for: Porosity regulation of metal–organic frameworks for high proton conductivity by rational ligand design: mono- versus disulfonyl-4,4′-biphenyldicarboxylic acid
Source: Royal Society of Chemistry journal article supplement (doi:10.1039/d1qi01610e), 2022-01-01
Supplement: d1qi01610e1.pdf [file d1qi01610e1.pdf]

## Electronic Supplementary Information (ESI) for

# Porosity regulation of metal-organic frameworks for high proton conductivity by rational ligand design: mono- versus disulfonyl-4,4'-biphenyldicarboxylic acid

Shunlin Zhang,<sup>a</sup> Yuxin Xie,<sup>a</sup> Mengrui Yang,<sup>a</sup> Dunru Zhu<sup>ab\*</sup>

<sup>a</sup> College of Chemical Engineering, State Key Laboratory of Materials-oriented Chemical Engineering, Nanjing Tech University, 30 Puzhu South Road, Nanjing, Jiangsu 211816, China.

<sup>b</sup> State Key Laboratory of Coordination Chemistry, Nanjing University, 163 Xianlin Avenue, Nanjing, Jiangsu 210023, China.

\*Correspondence e-mail: zhudr@njtech.edu.cn

### Contents

|                                                                           |     |
|---------------------------------------------------------------------------|-----|
| 1. The FT-IR and <sup>1</sup> HNMR spectra of <b>H<sub>3</sub>L</b> ..... | S2  |
| 2. Molecular structures of MOFs <b>1-3</b> .....                          | S3  |
| 3. The FT-IR spectra of MOFs <b>1-3</b> .....                             | S4  |
| 4. The PXRD patterns of MOFs <b>1-3</b> .....                             | S5  |
| 5. The thermogravimetric analysis of MOFs <b>1-3</b> .....                | S7  |
| 6. Crystal structure determination.....                                   | S8  |
| 7. Proton conductivity measurement.....                                   | S10 |

# 1. The FT-IR and <sup>1</sup>HNMR spectra of H<sub>3</sub>L

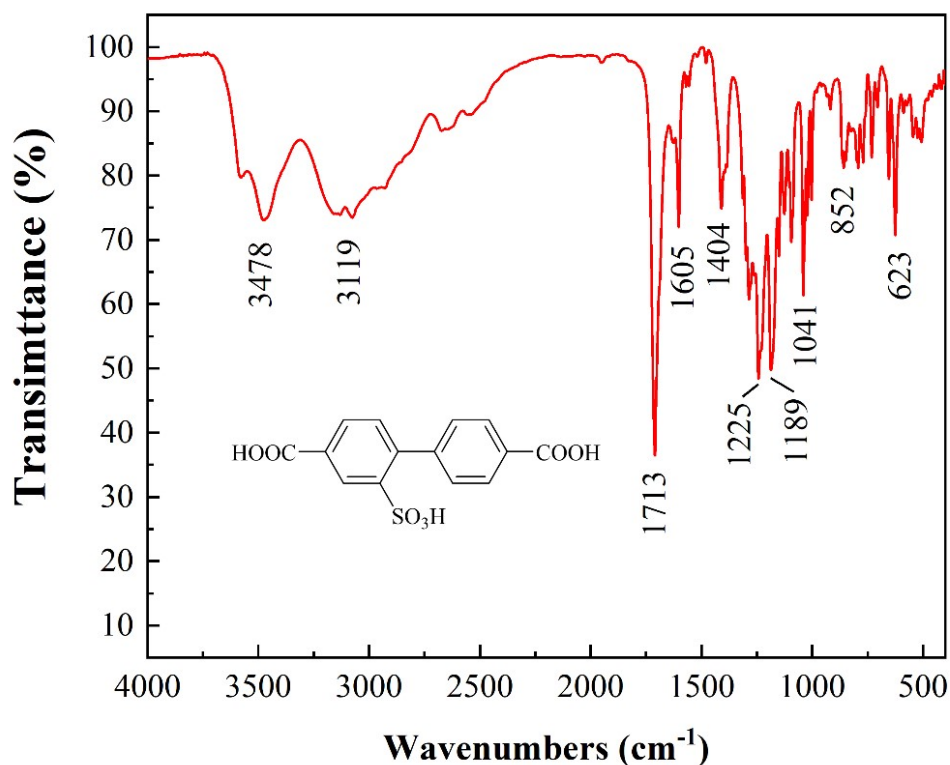

Fig. S1 FT-IR spectra of H<sub>3</sub>L.

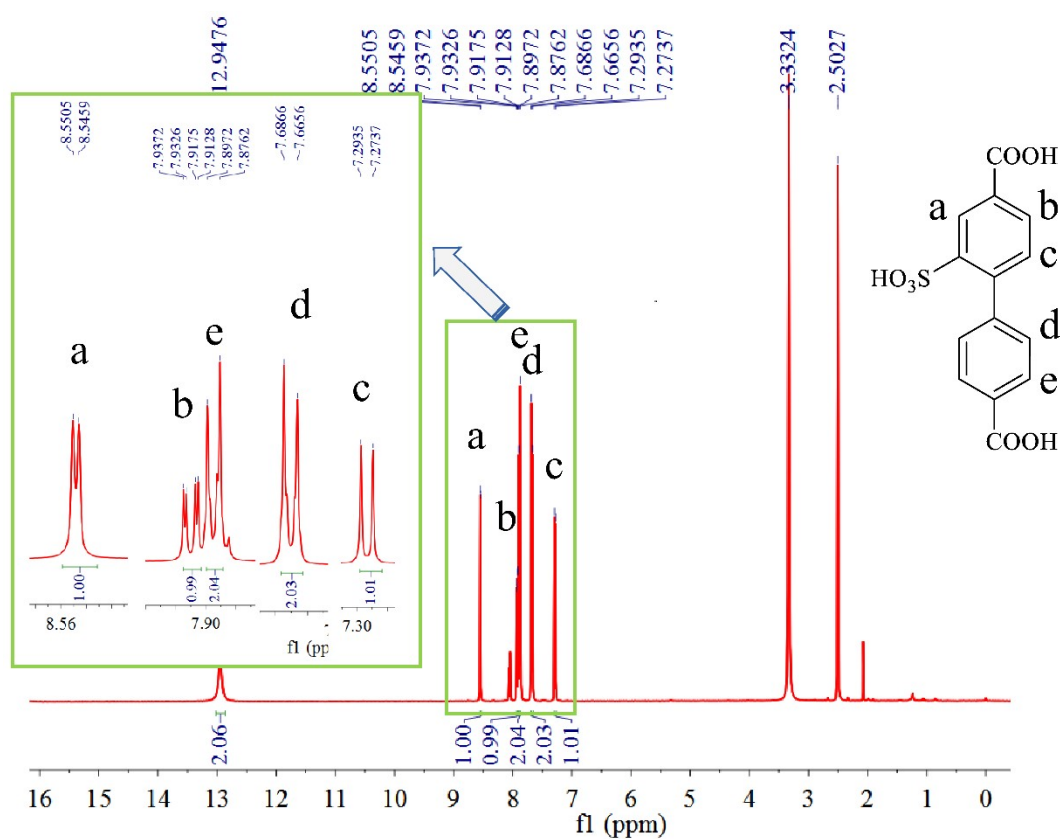

Fig. S2 <sup>1</sup>HNMR spectrum of H<sub>3</sub>L

## 2. Molecular structures of MOFs 1-3

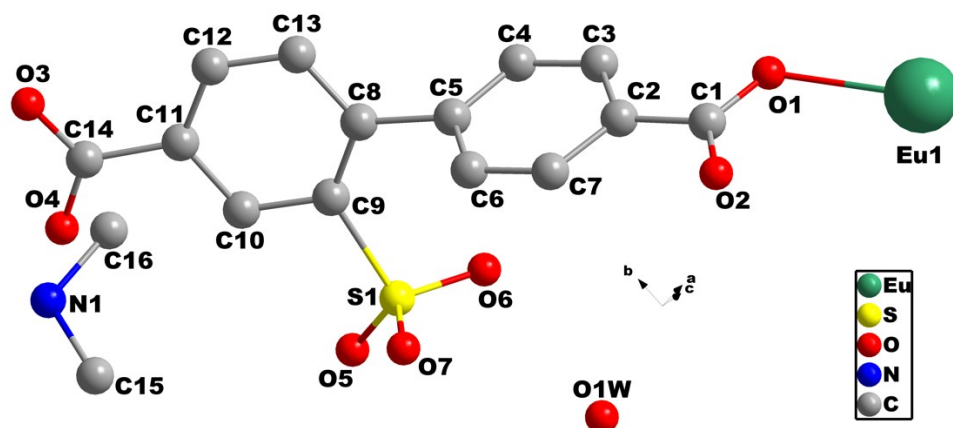

Fig. S3 Asymmetric unit of **1** (H and disordered atoms are omitted for clarity).

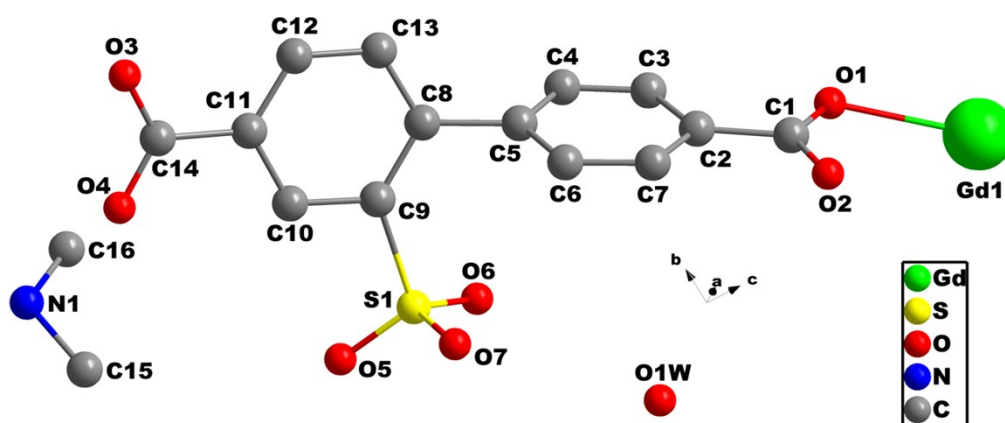

Fig. S4 Asymmetric unit of **2** (H and disordered atoms are omitted for clarity).

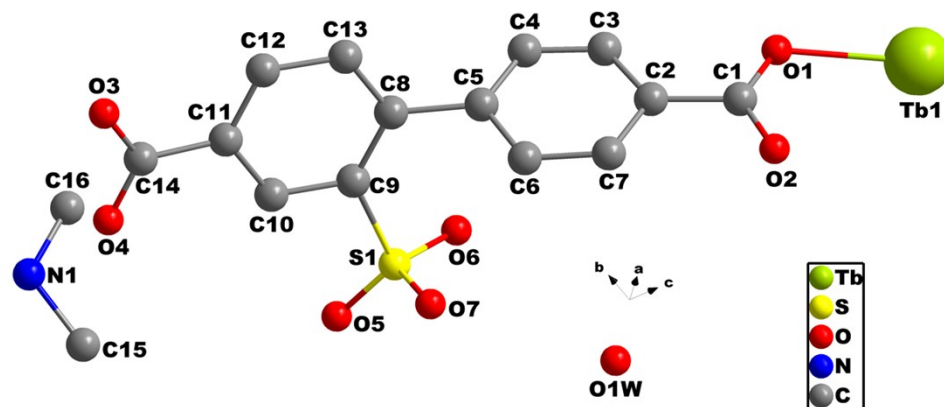

Fig. S5 Asymmetric unit of **3** (H and disordered atoms are omitted for clarity).

### 3. The FT-IR spectra of MOFs 1-3

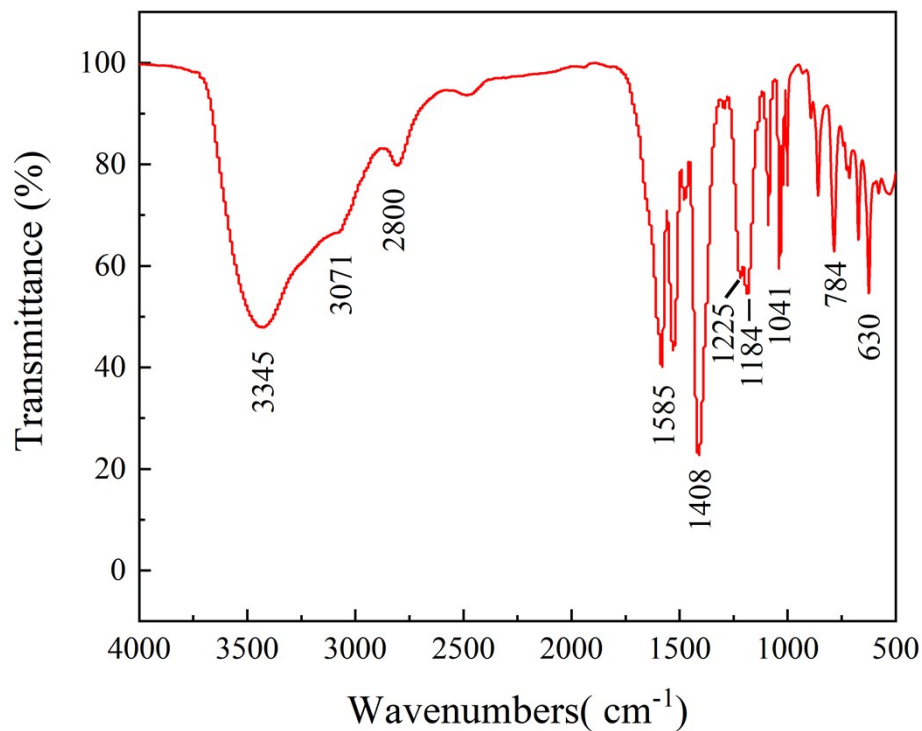

**Fig. S6** FT-IR spectra of 1.

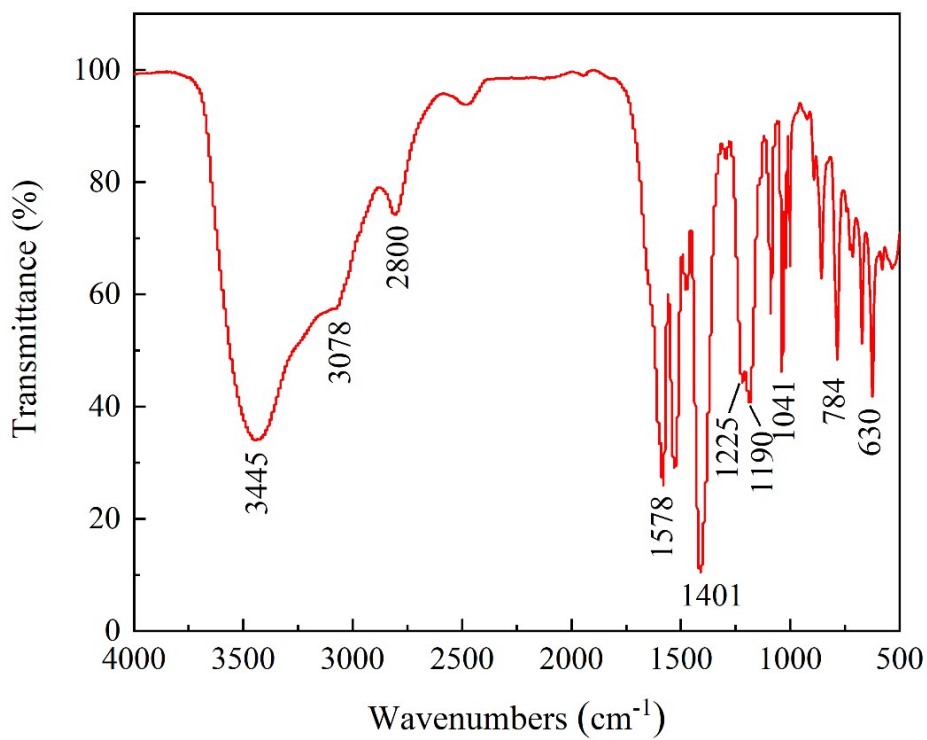

**Fig. S7** FT-IR spectra of 2.

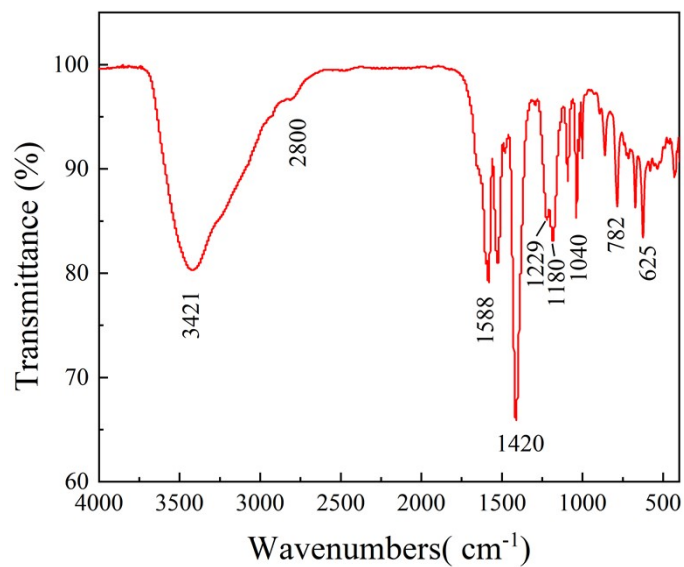

**Fig. S8** FT-IR spectra of **3**.

#### 4. The PXRD patterns of MOFs 1-3

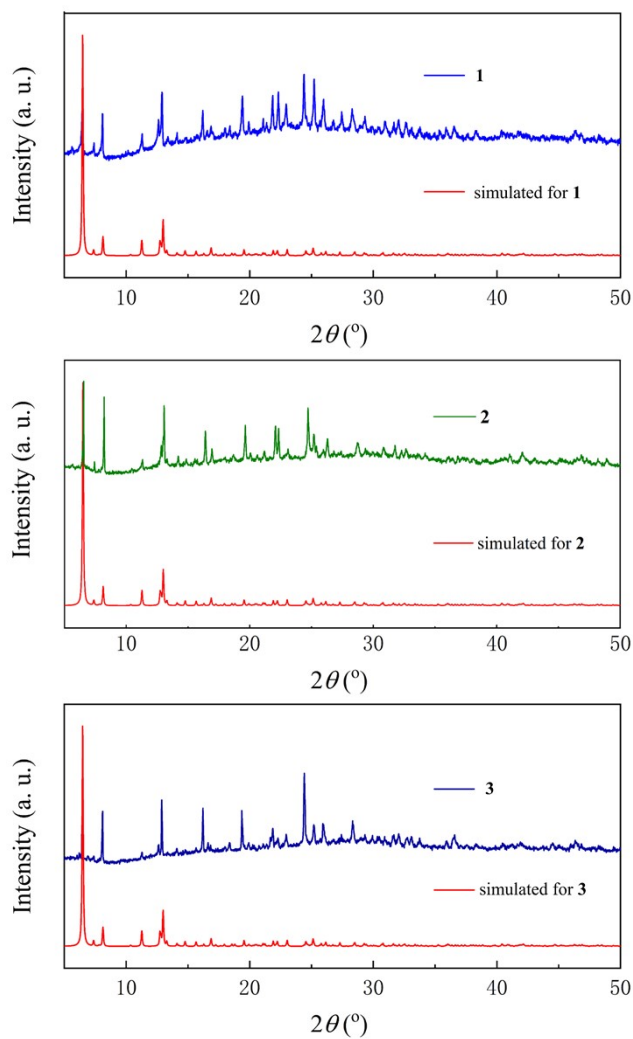

**Fig. S9** Experimental and simulated powder X-ray diffraction patterns of MOFs **1-3**.

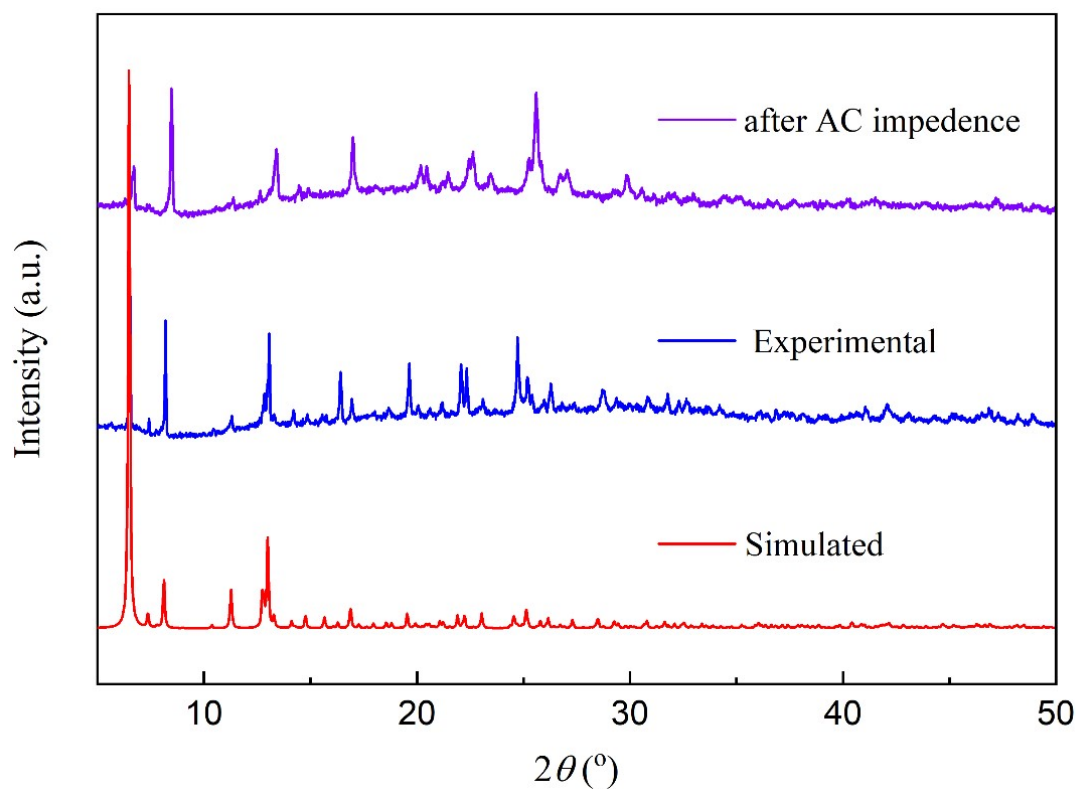

**Fig. S10** Experimental and simulated PXRd patterns of **2** and after 72h AC impedance measurements.

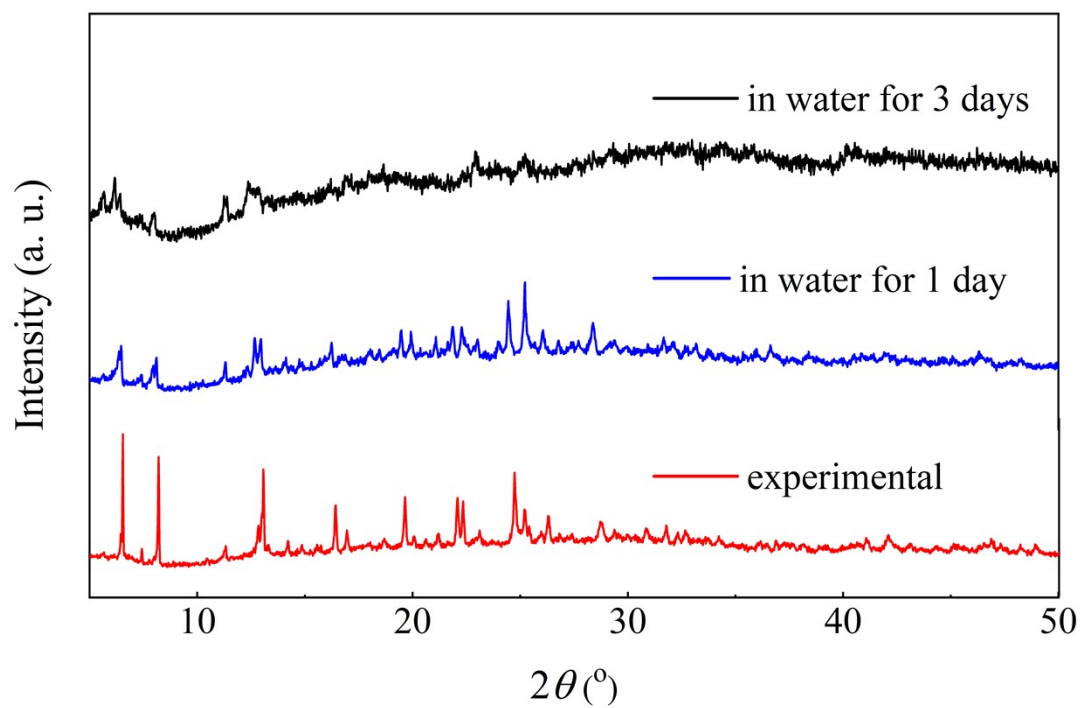

**Fig. S11** Experimental PXRd patterns of **2** and after water immersion.

## 5. The thermogravimetric analysis of MOFs 1-3

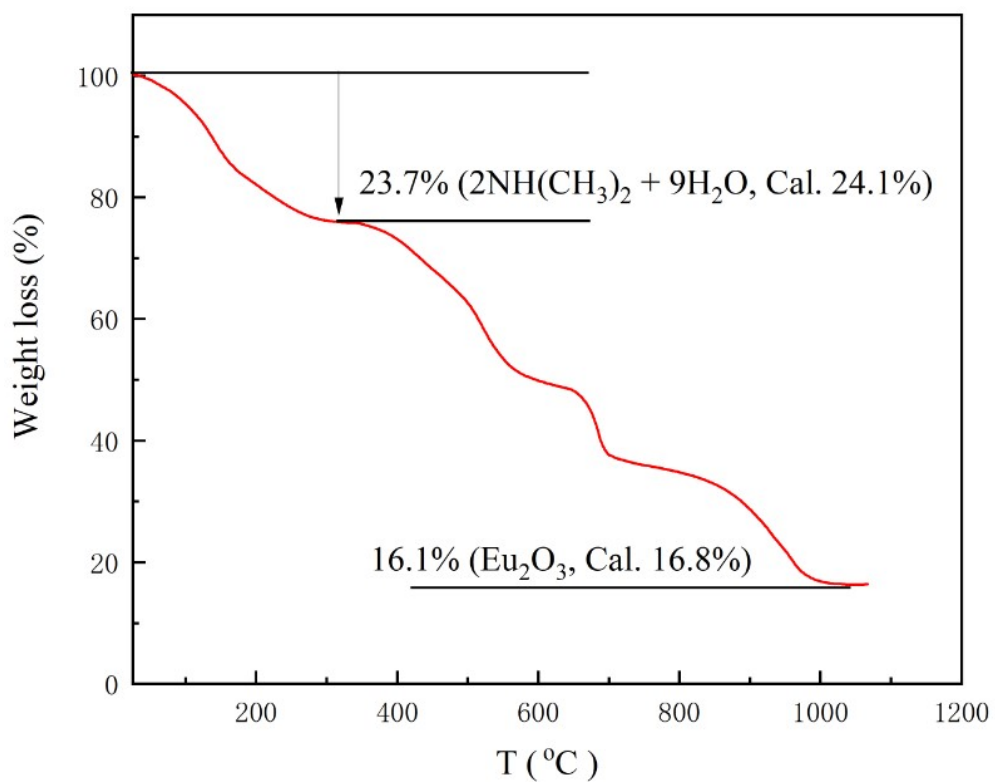

**Fig. S12** TGA curve for **1**

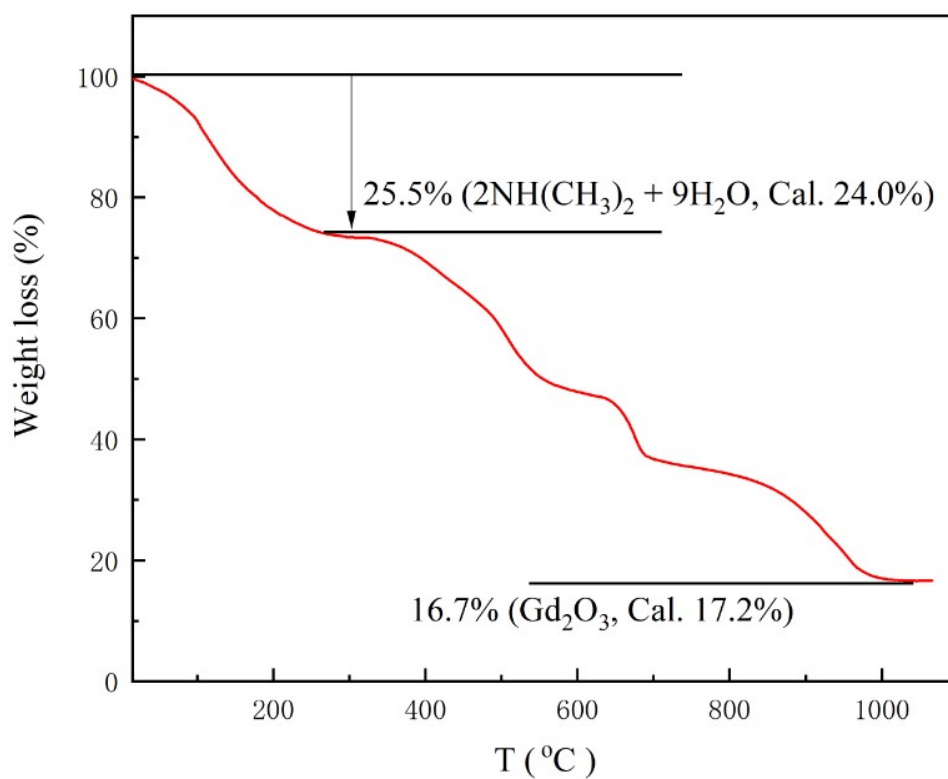

**Fig. S13** TGA curve for **2**

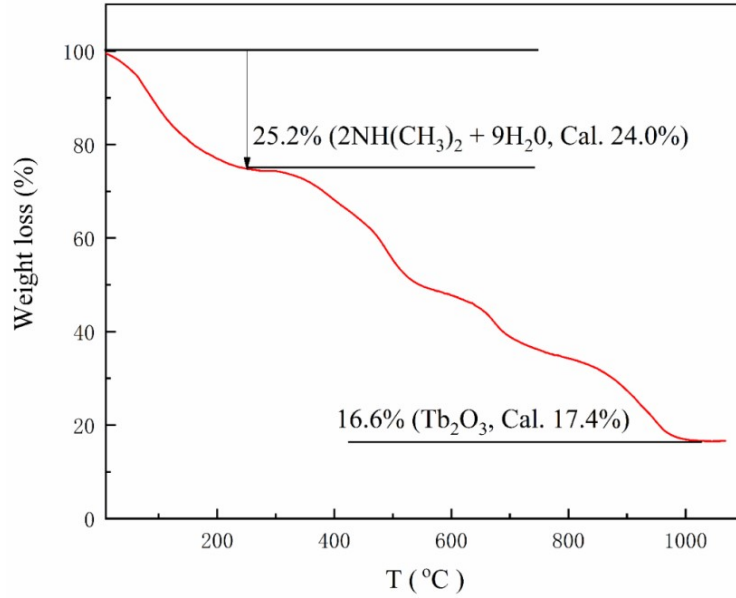

**Fig. S14** TGA curve for **3**

## 6. Crystal structure determination

**Table S1** Crystallographic data for **MOFs 1-3**

| MOFs                                                                        | <b>1</b>                                | <b>2</b>                                 | <b>3</b>                                 |
|-----------------------------------------------------------------------------|-----------------------------------------|------------------------------------------|------------------------------------------|
| Empirical formula                                                           | $C_{32}H_{49}EuN_2O_{23}S_2$            | $C_{32}H_{49}GdN_2O_{23}S_2$             | $C_{32}H_{49}TbN_2O_{23}S_2$             |
| Formula weight                                                              | 1045.83                                 | 1051.11                                  | 1052.79                                  |
| Crystal system                                                              | Orthorhombic                            | Orthorhombic                             | Orthorhombic                             |
| Space group                                                                 | <i>Pnnn</i>                             | <i>Pnnn</i>                              | <i>Pnnn</i>                              |
| <i>a</i> (Å)                                                                | 14.1253(17)                             | 14.1306(15)                              | 14.1106(8)                               |
| <i>b</i> (Å)                                                                | 17.038(2)                               | 17.0415(18)                              | 17.1352(9)                               |
| <i>c</i> (Å)                                                                | 22.649(3)                               | 22.636(2)                                | 22.4486(12)                              |
| <i>V</i> (Å <sup>3</sup> )                                                  | 5450.9(12)                              | 5450.9(10)                               | 5427.8(5)                                |
| <i>Z</i>                                                                    | 4                                       | 4                                        | 4                                        |
| <i>D<sub>c</sub></i> (g·cm <sup>-3</sup> )                                  | 1.096                                   | 1.103                                    | 1.109                                    |
| $\mu$ (mm <sup>-1</sup> )                                                   | 1.275                                   | 1.341                                    | 1.428                                    |
| <i>F</i> (000)                                                              | 1808.0                                  | 1812.0                                   | 1816.0                                   |
| Crystal size (mm <sup>3</sup> )                                             | 0.25×0.15×0.10                          | 0.25×0.13×0.10                           | 0.25×0.13×0.10                           |
| $\theta$ Range (°)                                                          | 1.496-24.998                            | 1.496-24.998                             | 1.495-25.048                             |
| Reflections collected                                                       | 36995                                   | 36891                                    | 36784                                    |
| Independent reflections                                                     | 4826 [ <i>R</i> <sub>int</sub> = 0.044] | 4826 [ <i>R</i> <sub>int</sub> = 0.0268] | 4825 [ <i>R</i> <sub>int</sub> = 0.0407] |
| Reflections observed [ <i>I</i> > 2σ( <i>I</i> )]                           | 3087                                    | 3331                                     | 3064                                     |
| Data/restraints/parameters                                                  | 4826/360/321                            | 4826/216/323                             | 4825/372/321                             |
| Goodness-of-fit on <i>F</i> <sup>2</sup>                                    | 1.090                                   | 1.082                                    | 1.099                                    |
| <i>R</i> <sub>1</sub> / <i>wR</i> <sub>2</sub> [ <i>I</i> > 2σ( <i>I</i> )] | 0.0624/0.2249                           | 0.0597/0.2134                            | 0.0629/0.2261                            |
| <i>R</i> <sub>1</sub> / <i>wR</i> <sub>2</sub> (all data)                   | 0.0889/0.2503                           | 0.0783/0.2381                            | 0.0905/0.2502                            |
| Max., Min. Δρ (e·Å <sup>-3</sup> )                                          | 1.325, -0.906                           | 2.156, -0.820                            | 2.001, -0.866                            |



**Table S2** Selected bond lengths (Å) and angles (°) for **1-3**

|                                         |            |                                         |            |
|-----------------------------------------|------------|-----------------------------------------|------------|
| <b>1</b>                                |            |                                         |            |
| Eu1–O1                                  | 2.414(5)   | Eu1–O3 <sup>i</sup>                     | 2.477(6)   |
| Eu1–O2 <sup>ii</sup>                    | 2.313(5)   | Eu1–O4 <sup>i</sup>                     | 2.487(5)   |
| <b>2</b>                                |            |                                         |            |
| Gd1–O1                                  | 2.413(4)   | Gd1–O3 <sup>i</sup>                     | 2.468(5)   |
| Gd1–O2 <sup>ii</sup>                    | 2.311(4)   | Gd1–O4 <sup>i</sup>                     | 2.485(4)   |
| <b>3</b>                                |            |                                         |            |
| Tb1–O1                                  | 2.373(5)   | Tb1–O3 <sup>i</sup>                     | 2.455(5)   |
| Tb1–O2 <sup>ii</sup>                    | 2.289(5)   | Tb1–O4 <sup>i</sup>                     | 2.458(5)   |
| <b>1</b>                                |            |                                         |            |
| O2–Eu1–O2 <sup>ii</sup>                 | 107.2(3)   | O3 <sup>i</sup> –Eu1–O3 <sup>iv</sup>   | 95.0(3)    |
| O2–Eu1–O1                               | 80.70(18)  | O2–Eu1–O4 <sup>i</sup>                  | 156.86(18) |
| O2 <sup>ii</sup> –Eu1–O1                | 81.03(19)  | O2 <sup>ii</sup> –Eu1–O4 <sup>i</sup>   | 78.71(18)  |
| O2–Eu1–O1 <sup>iii</sup>                | 81.03(19)  | O1–Eu1–O4 <sup>i</sup>                  | 78.14(17)  |
| O2 <sup>ii</sup> –Eu1–O1 <sup>iii</sup> | 80.70(18)  | O1 <sup>iii</sup> –Eu1–O4 <sup>i</sup>  | 122.10(17) |
| O1–Eu1–O1 <sup>iii</sup>                | 149.0(2)   | O3 <sup>i</sup> –Eu1–O4 <sup>i</sup>    | 52.45(17)  |
| O2–Eu1–O3 <sup>i</sup>                  | 147.94(18) | O3 <sup>iv</sup> –Eu1–O4 <sup>i</sup>   | 77.61(18)  |
| O2 <sup>ii</sup> –Eu1–O3 <sup>i</sup>   | 87.42(19)  | O2–Eu1–O4 <sup>iv</sup>                 | 78.71(18)  |
| O1–Eu1–O3 <sup>i</sup>                  | 130.58(18) | O2 <sup>ii</sup> –Eu1–O4 <sup>iv</sup>  | 156.86(18) |
| O1 <sup>iii</sup> –Eu1–O3 <sup>i</sup>  | 73.20(19)  | O1–Eu1–O4 <sup>iv</sup>                 | 122.10(17) |
| O2–Eu1–O3 <sup>iv</sup>                 | 87.42(19)  | O1 <sup>iii</sup> –Eu1–O4 <sup>iv</sup> | 78.14(17)  |
| O2 <sup>ii</sup> –Eu1–O3 <sup>iv</sup>  | 147.94(18) | O3 <sup>i</sup> –Eu1–O4 <sup>iv</sup>   | 77.61(18)  |
| O1–Eu1–O3 <sup>iv</sup>                 | 73.20(19)  | O3 <sup>iv</sup> –Eu1–O4 <sup>iv</sup>  | 52.45(17)  |
| O1 <sup>iii</sup> –Eu1–O3 <sup>iv</sup> | 130.58(18) | O4 <sup>i</sup> –Eu1–O4 <sup>iv</sup>   | 104.9(2)   |
| <b>2</b>                                |            |                                         |            |
| O2–Gd1–O2 <sup>ii</sup>                 | 106.7(2)   | O3 <sup>i</sup> –Gd1–O3 <sup>iv</sup>   | 95.2(3)    |
| O2–Gd1–O1                               | 81.13(16)  | O2–Gd1–O4 <sup>i</sup>                  | 156.78(15) |
| O2 <sup>ii</sup> –Gd1–O1                | 81.13(16)  | O2 <sup>ii</sup> –Gd1–O4 <sup>i</sup>   | 79.03(15)  |
| O2–Gd1–O1 <sup>iii</sup>                | 81.13(16)  | O1–Gd1–O4 <sup>i</sup>                  | 78.14(14)  |
| O2 <sup>ii</sup> –Gd1–O1 <sup>iii</sup> | 80.57(15)  | O1 <sup>iii</sup> –Gd1–O4 <sup>i</sup>  | 122.08(14) |
| O1–Gd1–O1 <sup>iii</sup>                | 149.1(2)   | O3 <sup>i</sup> –Gd1–O4 <sup>i</sup>    | 52.60(14)  |
| O2–Gd1–O3 <sup>i</sup>                  | 147.97(14) | O3 <sup>iv</sup> –Gd1–O4 <sup>i</sup>   | 77.49(15)  |
| O2 <sup>ii</sup> –Gd1–O3 <sup>i</sup>   | 87.54(16)  | O2–Gd1–O4 <sup>iv</sup>                 | 79.03(15)  |
| O1–Gd1–O3 <sup>i</sup>                  | 130.72(15) | O2 <sup>ii</sup> –Gd1–O4 <sup>iv</sup>  | 156.78(15) |
| O1 <sup>iii</sup> –Gd1–O3 <sup>i</sup>  | 72.98(16)  | O1–Gd1–O4 <sup>iv</sup>                 | 78.14(14)  |
| O2–Gd1–O3 <sup>iv</sup>                 | 87.54(16)  | O1 <sup>iii</sup> –Gd1–O4 <sup>iv</sup> | 122.08(14) |
| O2 <sup>ii</sup> –Gd1–O3 <sup>iv</sup>  | 147.97(15) | O3 <sup>i</sup> –Gd1–O4 <sup>iv</sup>   | 77.49(15)  |
| O1–Gd1–O3 <sup>iv</sup>                 | 72.98(16)  | O3 <sup>iv</sup> –Gd1–O4 <sup>iv</sup>  | 52.60(14)  |
| O1 <sup>iii</sup> –Gd1–O3 <sup>iv</sup> | 130.72(14) | O4 <sup>i</sup> –Gd1–O4 <sup>iv</sup>   | 104.7(2)   |
| <b>3</b>                                |            |                                         |            |
| O2–Tb1–O2 <sup>ii</sup>                 | 107.2(3)   | O3 <sup>i</sup> –Tb1–O3 <sup>iv</sup>   | 94.6(3)    |
| O2–Tb1–O1                               | 80.12(19)  | O2–Tb1–O4 <sup>i</sup>                  | 156.19(18) |

|                                         |            |                                         |            |
|-----------------------------------------|------------|-----------------------------------------|------------|
| O2 <sup>ii</sup> -Tb1-O1                | 80.90(19)  | O2 <sup>ii</sup> -Tb1-O4 <sup>i</sup>   | 78.49(18)  |
| O2-Tb1-O1 <sup>iii</sup>                | 80.9(2)    | O1-Tb1-O4 <sup>i</sup>                  | 77.99(18)  |
| O2 <sup>ii</sup> -Tb1-O1 <sup>iii</sup> | 80.12(19)  | O1 <sup>iii</sup> -Tb1-O4 <sup>i</sup>  | 122.88(18) |
| O1-Tb1-O1 <sup>iii</sup>                | 147.7(3)   | O3 <sup>i</sup> -Tb1-O4 <sup>i</sup>    | 52.82(18)  |
| O2-Tb1-O3 <sup>i</sup>                  | 148.32(18) | O3 <sup>iv</sup> -Tb1-O4 <sup>i</sup>   | 77.71(18)  |
| O2 <sup>ii</sup> -Tb1-O3 <sup>i</sup>   | 87.36(19)  | O2-Tb1-O4 <sup>iv</sup>                 | 78.49(18)  |
| O1-Tb1-O3 <sup>i</sup>                  | 130.79(18) | O2 <sup>ii</sup> -Tb1-O4 <sup>iv</sup>  | 156.19(18) |
| O1 <sup>iii</sup> -Tb1-O3 <sup>i</sup>  | 73.94(19)  | O1-Tb1-O4 <sup>iv</sup>                 | 122.88(18) |
| O2-Tb1-O3 <sup>iv</sup>                 | 87.36(19)  | O1 <sup>iii</sup> -Tb1-O4 <sup>iv</sup> | 77.99(18)  |
| O2 <sup>ii</sup> -Tb1-O3 <sup>iv</sup>  | 148.32(18) | O3 <sup>i</sup> -Tb1-O4 <sup>iv</sup>   | 77.71(18)  |
| O1-Tb1-O3 <sup>iv</sup>                 | 73.9(2)    | O3 <sup>iv</sup> -Tb1-O4 <sup>iv</sup>  | 52.82(18)  |
| O1 <sup>iii</sup> -Tb1-O3 <sup>iv</sup> | 130.79(18) | O4 <sup>i</sup> -Tb1-O4 <sup>iv</sup>   | 105.9(3)   |

Symmetry codes: (i)  $1/2+x, 1-y, 1/2+z$ ; (ii)  $1/2-x, y, 3/2-z$ ; (iii)  $x, 1/2-y, 3/2-z$ ; (iv)  $1/2+x, 1/2-y, 1-z$ .

**Table S3** Hydrogen-bonding geometry (Å, °) for **2**

| D-H...A                        | d(D-H) | d(H...A) | d(D...A)  | ∠D-H...A |
|--------------------------------|--------|----------|-----------|----------|
| N1-H1A...O4                    | 0.89   | 2.26     | 2.893(10) | 128      |
| N1-H1B...O5A <sup>i</sup>      | 0.89   | 1.85     | 2.604(3)  | 141      |
| O1W-H1WA...O7                  | 0.85   | 2.53     | 3.352(5)  | 163      |
| O1W-H1WB...O6 <sup>ii</sup>    | 0.85   | 2.92     | 3.751(5)  | 169      |
| O1W-H1WC...O7A <sup>iii</sup>  | 0.85   | 2.96     | 3.734(6)  | 154      |
| O1WA-H1WD...O6                 | 0.85   | 2.19     | 3.009(2)  | 161      |
| O1WA-H1WE...O5 <sup>i</sup>    | 0.85   | 2.50     | 3.123(4)  | 131      |
| O1WA-H1WF...O1WA <sup>iv</sup> | 0.85   | 2.39     | 3.230(7)  | 170      |
| C15-H15C...O4                  | 0.96   | 2.48     | 3.004(2)  | 115      |
| C16-H16C...π <sup>i</sup>      | 0.96   | 2.67     | 3.598(3)  | 162      |
| C6-H6...π <sup>v</sup>         | 0.93   | 3.24     | 3.943(2)  | 134      |

Symmetry codes: (i)  $1/2-x, y, 1/2-z$ ; (ii)  $1/2-x, 1/2-y, z$ ; (iii)  $x-1/2, y-1/2, 1-z$ ; (iv)  $x, 1/2-y, 1/2-z$ ; (v)  $-x, 1-y, 1-z$ .

## 7. Proton conductivity measurement

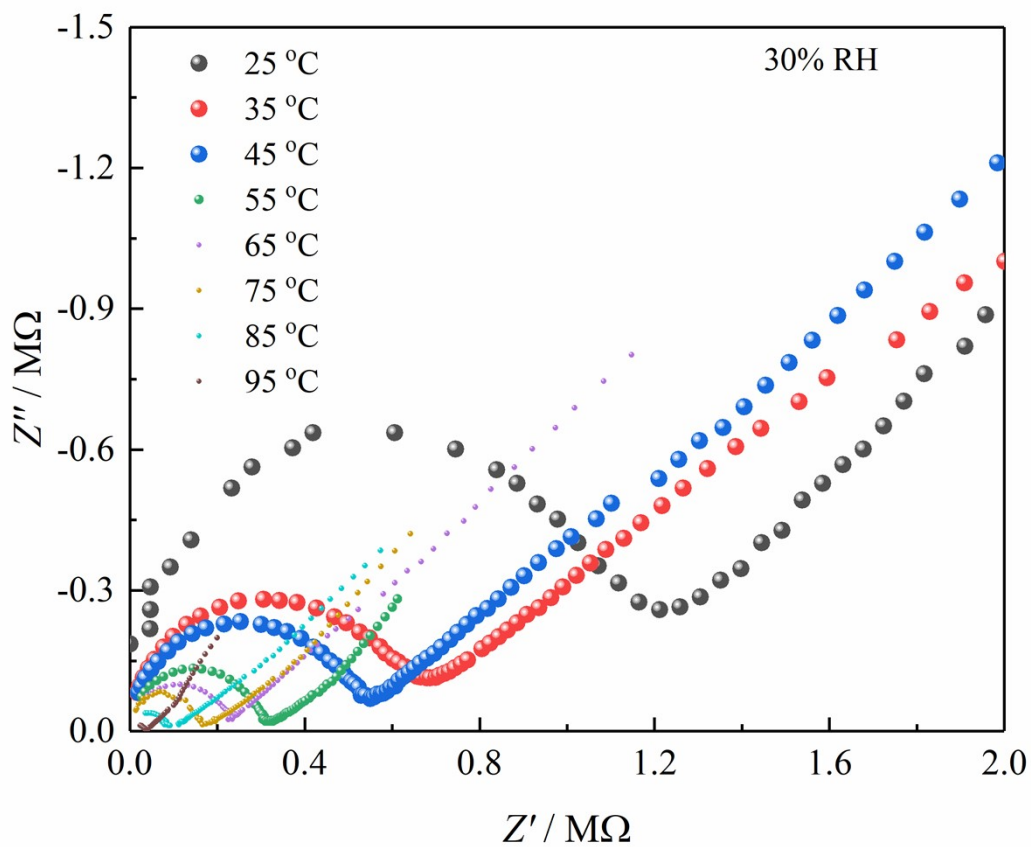

**Fig. S15** Temperature-dependent Nyquist plots of **2** under 30% RH

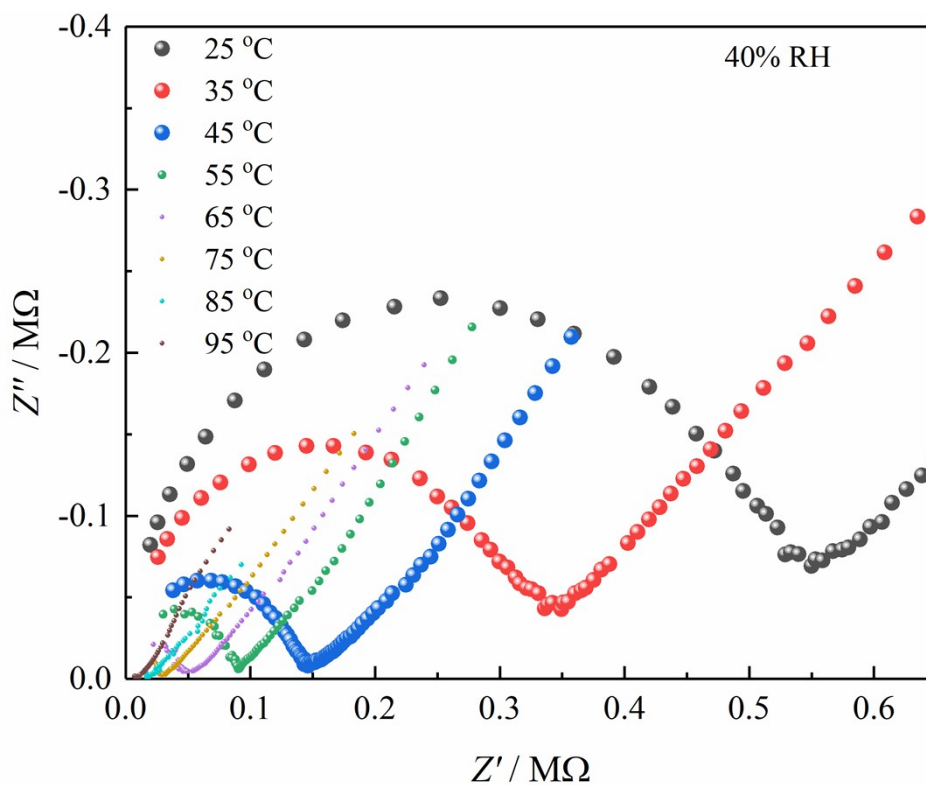

**Fig. S16** Temperature-dependent Nyquist plots of **2** under 40% RH

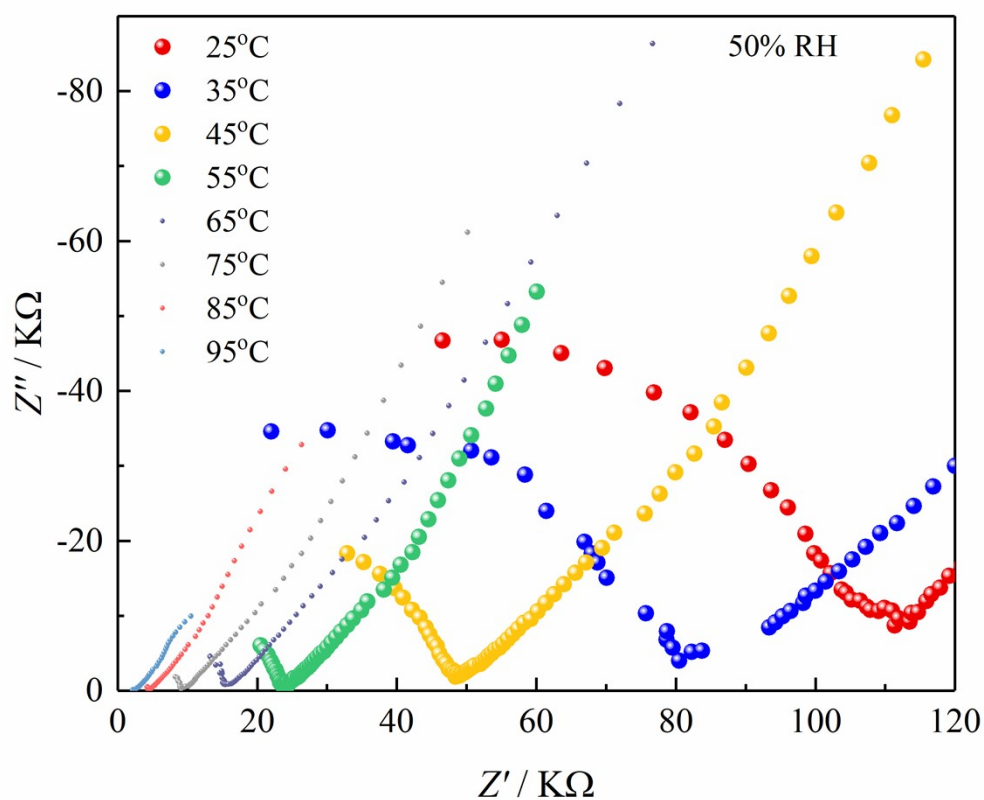

**Fig. S17** Temperature-dependent Nyquist plots of **2** under 50% RH

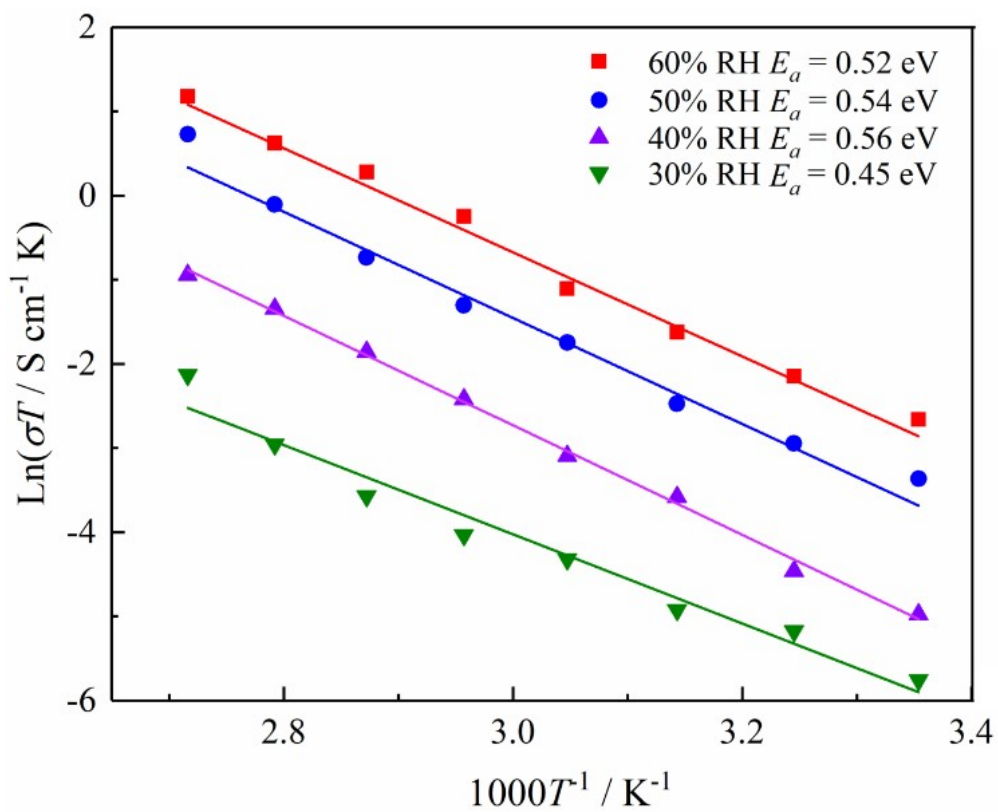

**Fig. S18** Arrhenius plot of **2** at 30-60% RH

**Table S4** Proton conductivities for **2** at various RH and temperature

| T (°C) | $\sigma$ (S cm <sup>-1</sup> ) |                       |                       |                       |
|--------|--------------------------------|-----------------------|-----------------------|-----------------------|
|        | 30% RH                         | 40% RH                | 50% RH                | 60% RH                |
| 25     | $1.06 \times 10^{-5}$          | $2.32 \times 10^{-5}$ | $1.16 \times 10^{-4}$ | $2.35 \times 10^{-4}$ |
| 35     | $1.84 \times 10^{-5}$          | $3.75 \times 10^{-5}$ | $1.70 \times 10^{-4}$ | $3.80 \times 10^{-4}$ |
| 45     | $2.28 \times 10^{-5}$          | $8.76 \times 10^{-5}$ | $2.65 \times 10^{-4}$ | $6.20 \times 10^{-4}$ |
| 55     | $4.04 \times 10^{-5}$          | $1.38 \times 10^{-4}$ | $5.32 \times 10^{-4}$ | $1.01 \times 10^{-3}$ |
| 65     | $5.23 \times 10^{-5}$          | $2.63 \times 10^{-4}$ | $8.04 \times 10^{-4}$ | $2.31 \times 10^{-3}$ |
| 75     | $8.06 \times 10^{-5}$          | $4.50 \times 10^{-4}$ | $1.38 \times 10^{-3}$ | $3.80 \times 10^{-3}$ |
| 85     | $1.45 \times 10^{-4}$          | $7.28 \times 10^{-4}$ | $2.51 \times 10^{-3}$ | $5.22 \times 10^{-3}$ |
| 95     | $3.22 \times 10^{-4}$          | $1.06 \times 10^{-3}$ | $5.62 \times 10^{-3}$ | $8.83 \times 10^{-3}$ |
